# Supplementary material
Source: Springer Nature journal article supplement (https://www.springermedizin.de/resource/supplementary/12887_2010_392_MOESM2_ESM.pdf/9475012)

Training therapists

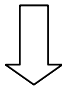

Intervention

Randomization  
therapists

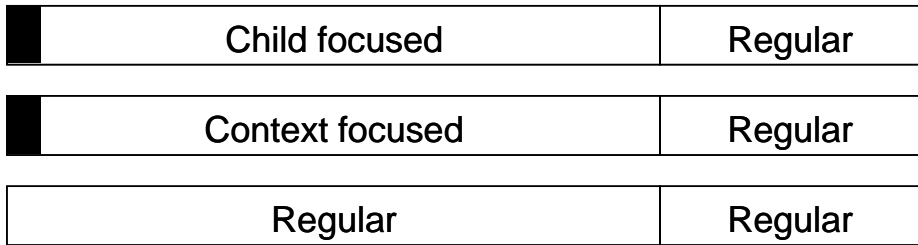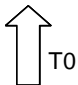

6 months

↑ = measurement

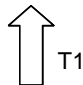

3 months

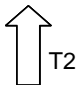

Supplement: MOESM2 [file 9475012]
